# Supplementary material
Source: Copernicus journal article supplement (doi:10.5194/egusphere-2026-2029)
Supplement: Supplementary file 1 [file egusphere-2026-2029-supplement.pdf]

Supplementary Material:  
Climate emulation framework METEORv1.6:  
Monthly climate variability and integrated  
impact assessment extensions

B. M. Sanderson et al.

April 9, 2026

## Supplemental Material

Table 1: Variance decomposition for the METEOR noise model across five CMIP6 models. Seasonal  $R^2$  shows variance explained by the temperature-dependent harmonic model; Anomaly  $R^2$  (PCA) shows variance of residuals explained by 40 principal components; Total  $R^2$  combines both components.

| Model        | Temperature |       |       | Precipitation |       |       |
|--------------|-------------|-------|-------|---------------|-------|-------|
|              | Seasonal    | PCA   | Total | Seasonal      | PCA   | Total |
| CanESM5      | 91.6%       | 76.8% | 98.1% | 34.4%         | 33.1% | 56.1% |
| CESM2-WACCM  | 90.7%       | 80.3% | 98.2% | 33.5%         | 45.4% | 63.7% |
| CNRM-ESM2-1  | 91.0%       | 75.3% | 97.8% | 30.9%         | 37.5% | 56.8% |
| IPSL-CM6A-LR | 91.3%       | 76.0% | 97.9% | 31.3%         | 28.5% | 50.9% |
| UKESM1-0-LL  | 90.6%       | 75.7% | 97.7% | 31.7%         | 34.9% | 55.5% |

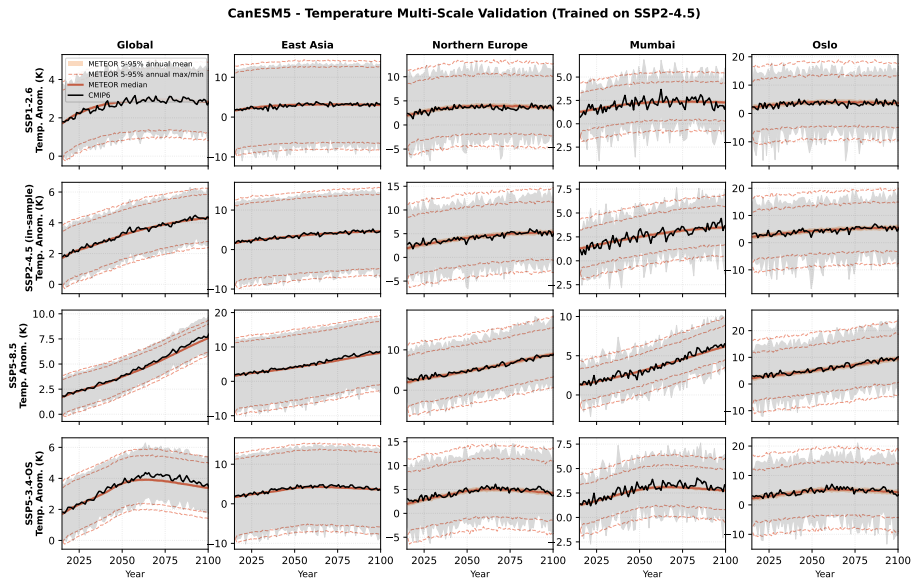

Supplemental Figure 1: Out-of-sample temperature validation for CanESM5 trained on SSP2-4.5. Layout as in Figure 7.

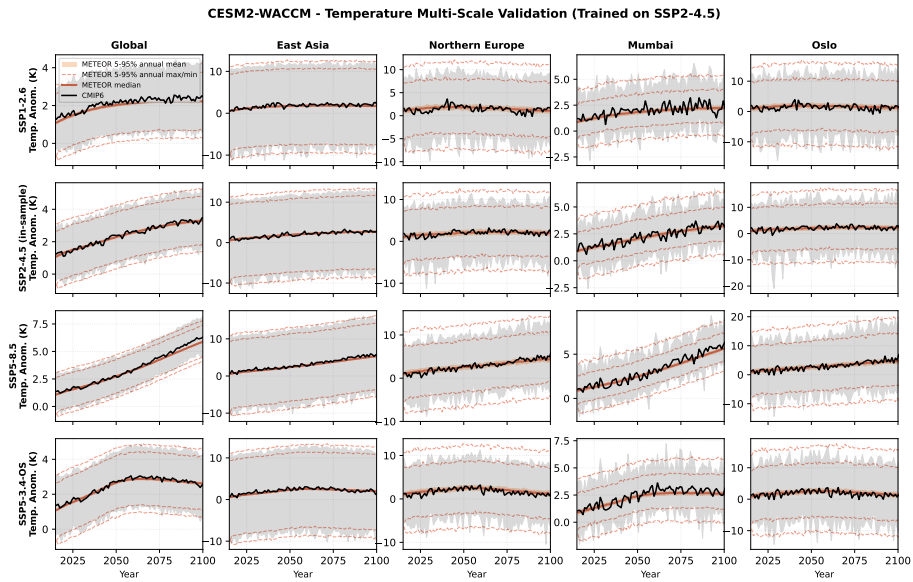

Supplemental Figure 2: Out-of-sample temperature validation for CESM2-WACCM trained on SSP2-4.5. Layout as in Figure 7.

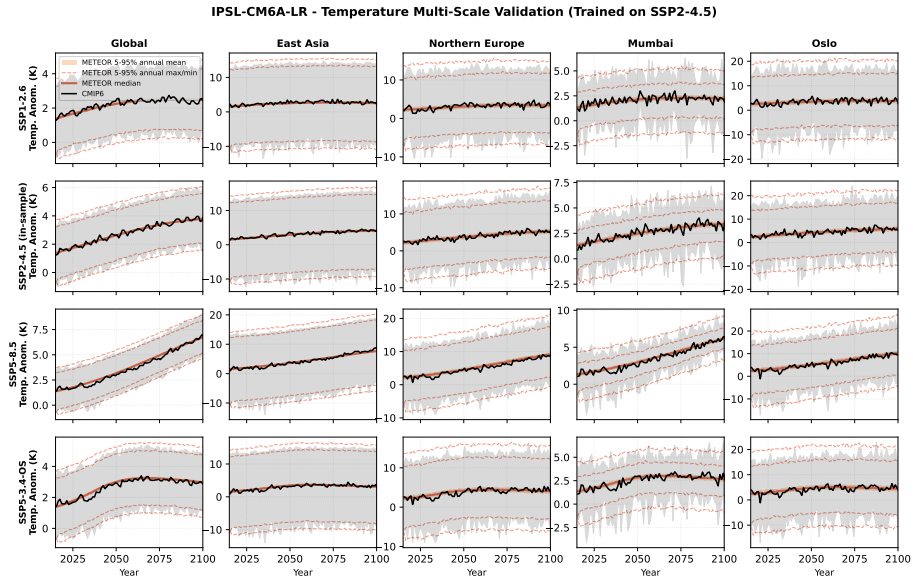

Supplemental Figure 3: Out-of-sample temperature validation for IPSL-CM6A-LR trained on SSP2-4.5. Layout as in Figure 7.

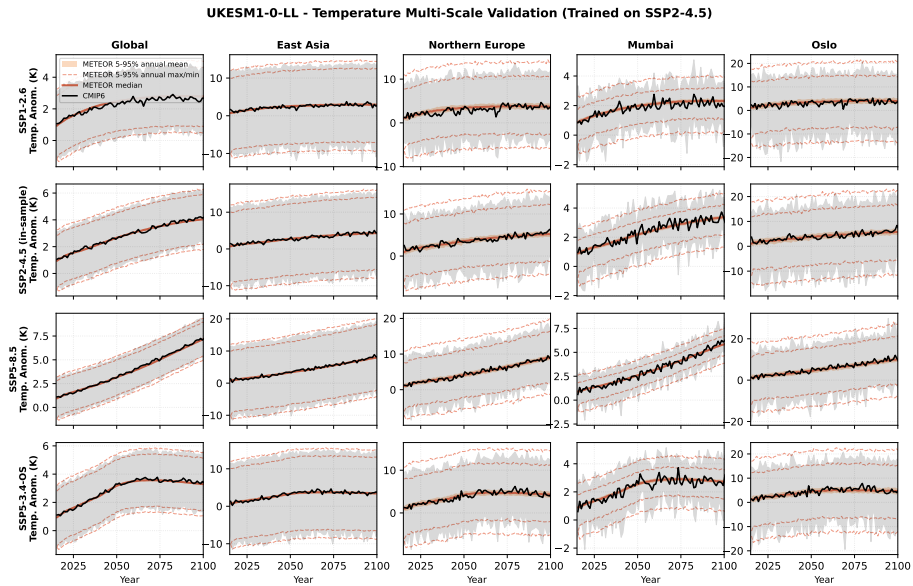

Supplemental Figure 4: Out-of-sample temperature validation for UKESM1-0-LL trained on SSP2-4.5. Layout as in Figure 7.

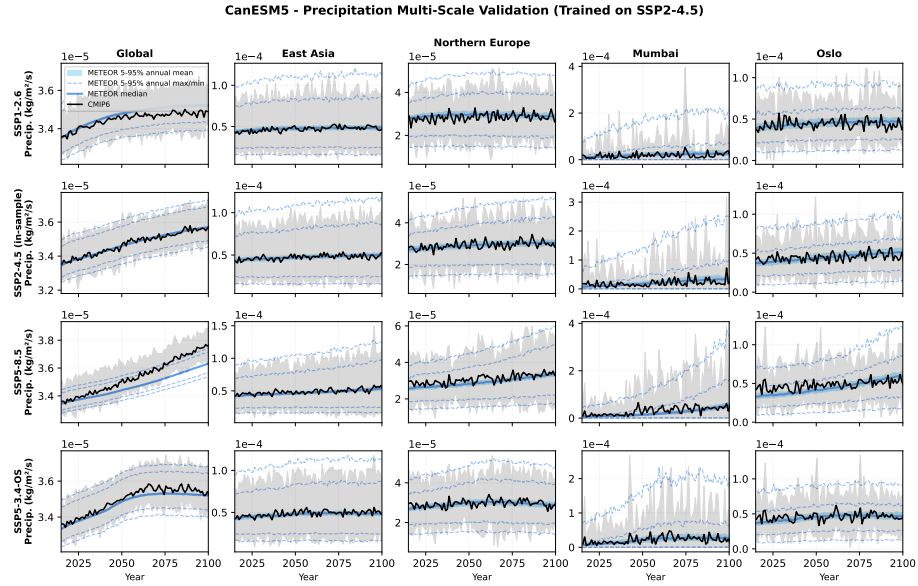

Supplemental Figure 5: Out-of-sample precipitation validation for CanESM5 trained on SSP2-4.5. Layout as in Figure 8.

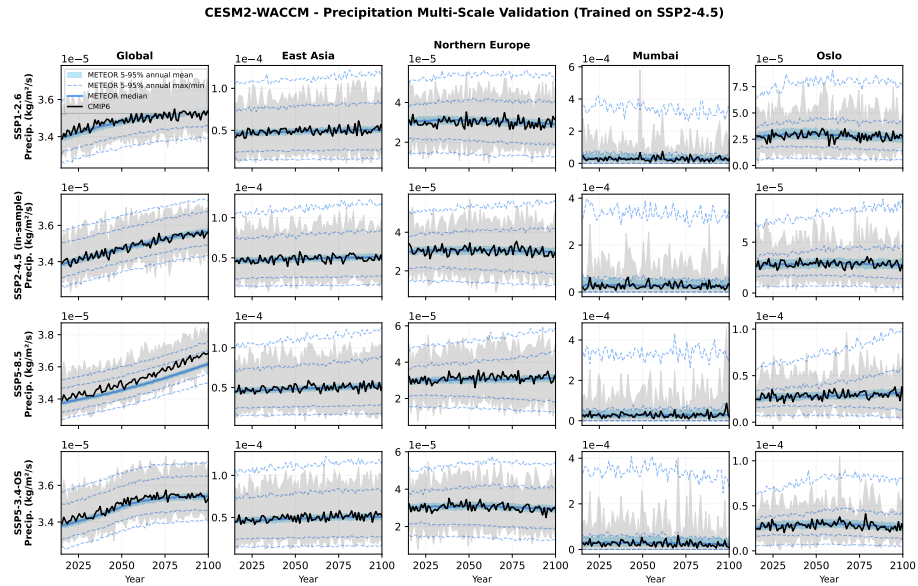

Supplemental Figure 6: Out-of-sample precipitation validation for CESM2-WACCM trained on SSP2-4.5. Layout as in Figure 8.

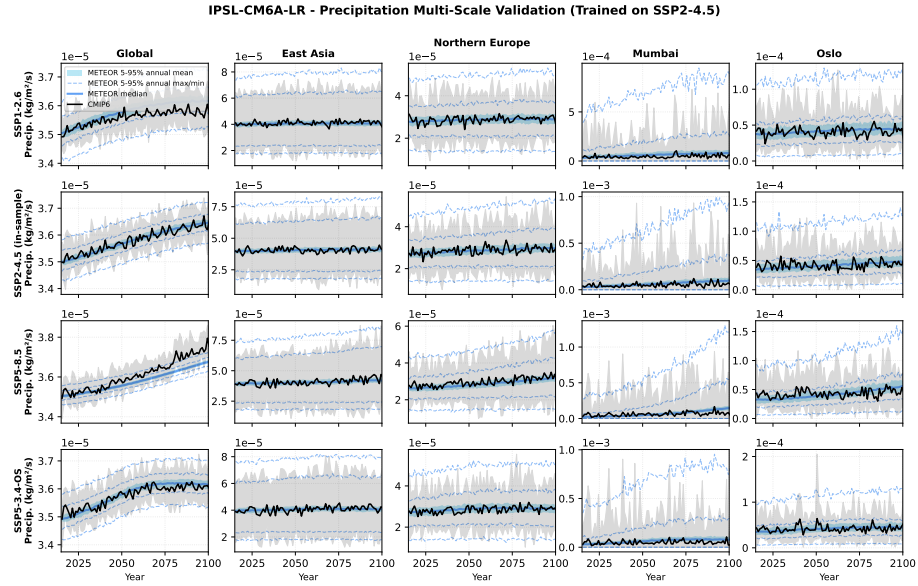

Supplemental Figure 7: Out-of-sample precipitation validation for IPSL-CM6A-LR trained on SSP2-4.5. Layout as in Figure 8.

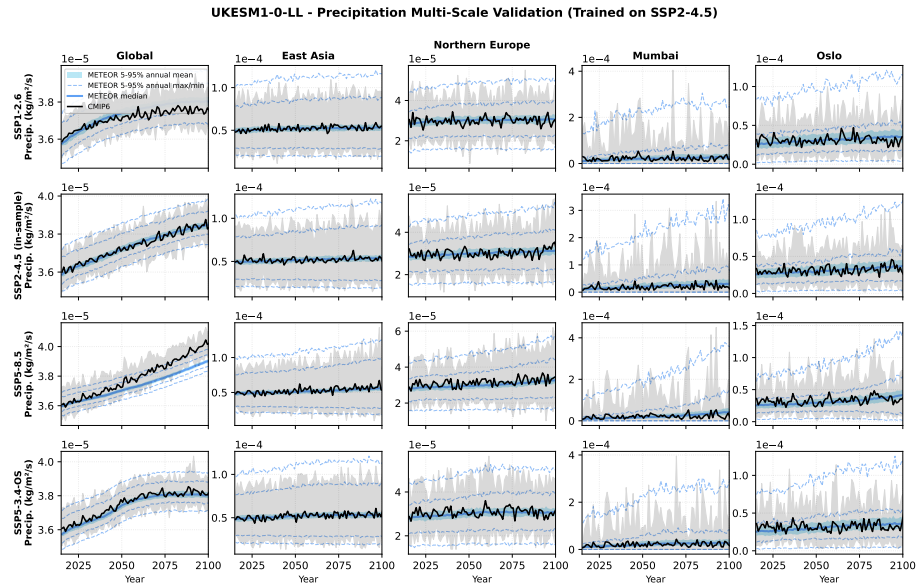

Supplemental Figure 8: Out-of-sample precipitation validation for UKESM1-0-LL trained on SSP2-4.5. Layout as in Figure 8.

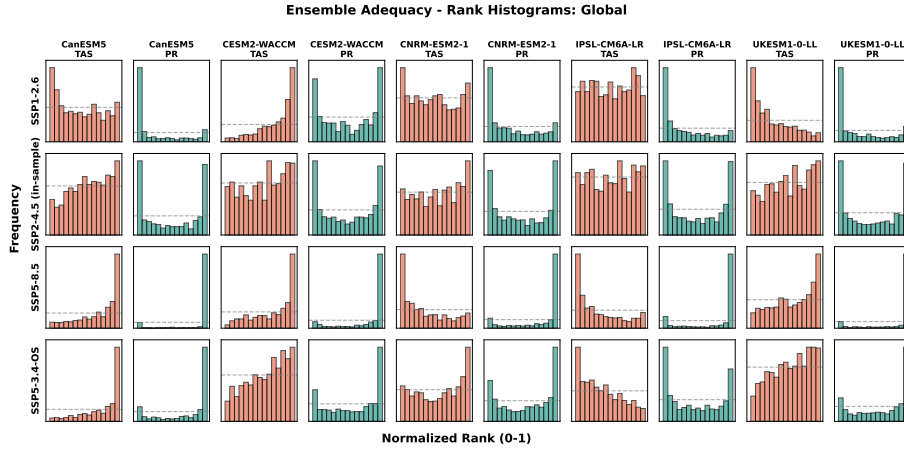

Supplemental Figure 9: Out-of-sample rank histograms for global mean. Layout as in Figure 9. Note the more pronounced underdispersion in precipitation compared to point-scale results, suggesting the precipitation distributional transform may be less appropriate for large-scale spatial aggregations.

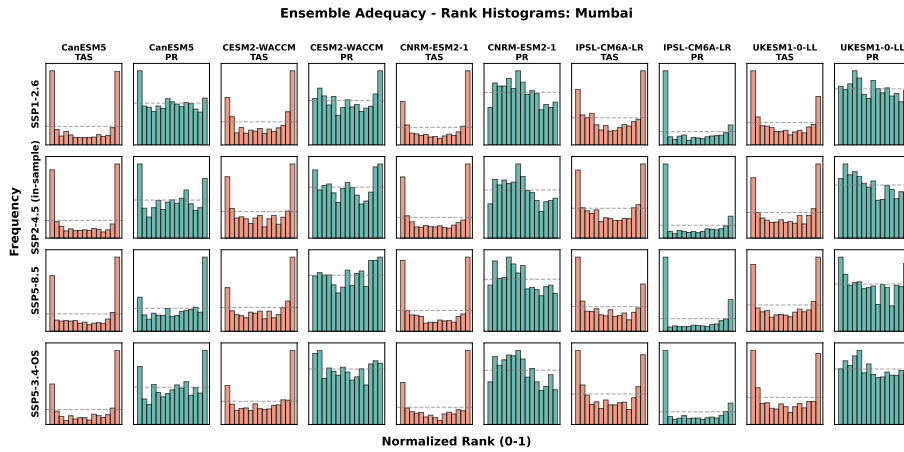

Supplemental Figure 10: Out-of-sample rank histograms for Mumbai, India. Layout as in Figure 9.

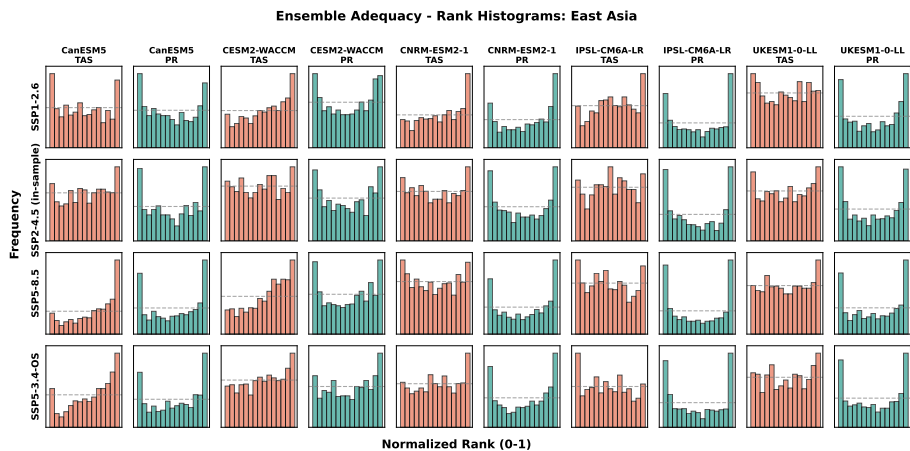

Supplemental Figure 11: Out-of-sample rank histograms for East Asia (AR6 region). Layout as in Figure 9.

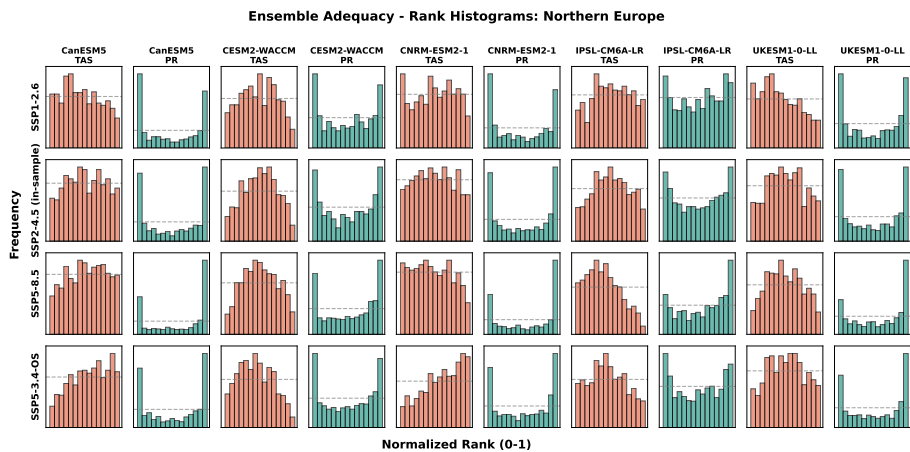

Supplemental Figure 12: Out-of-sample rank histograms for Northern Europe (AR6 region). Layout as in Figure 9.

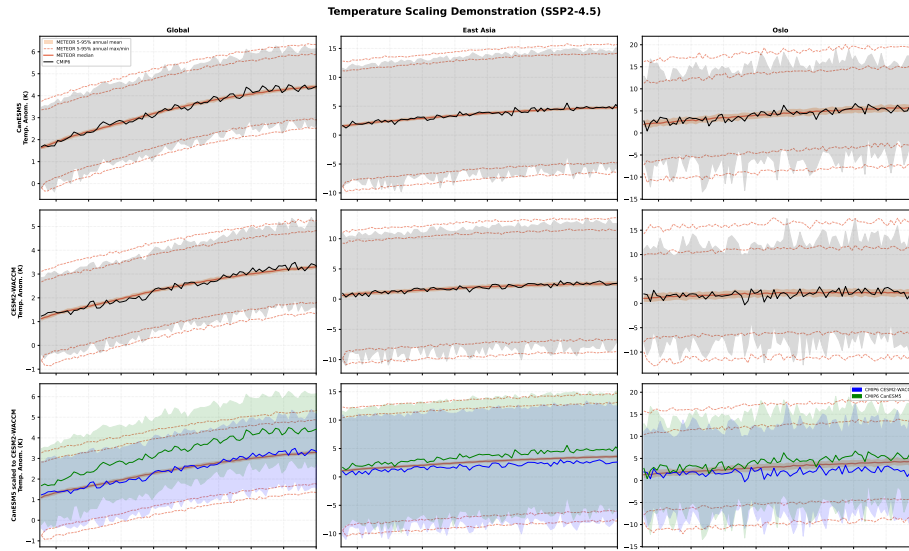

Supplemental Figure 13: Temperature anomaly results for ssp245 with a model trained on CanESM5, but scaled to the global mean timeseries of CESM2-WACCM, for global, regional and point scale. Results for the models trained directly on the two models are shown for comparison in the top two rows.

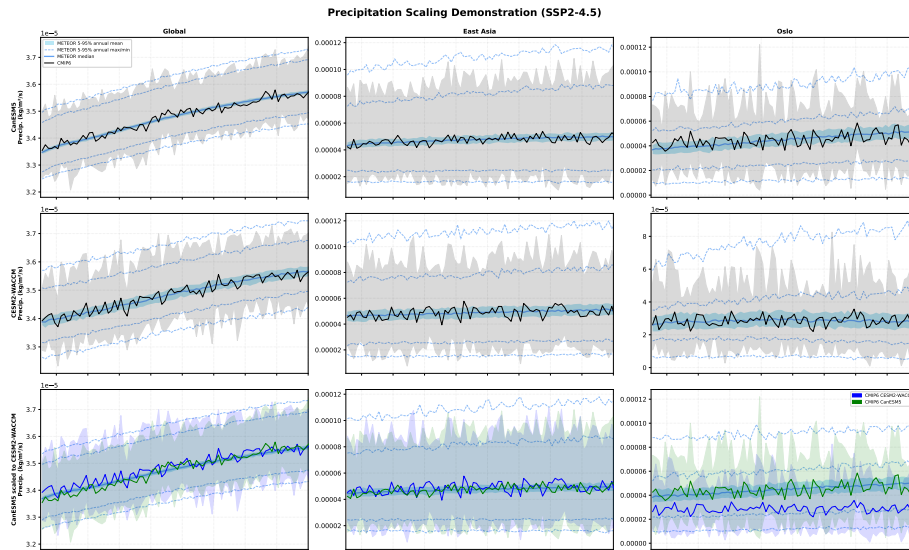

Supplemental Figure 14: Temperature anomaly results for ssp245 with a model trained on CanESM5, but scaled to the global mean timeseries of CESM2-WACCM, for global, regional and point scale. Results for the models trained directly on the two models are shown for comparison in the top two rows.
